# Supplementary material
Source: PubMed Central journal article supplement (PMC4022148)
Supplement: NIHMS569584-supplement-05.pdf [file NIHMS569584-supplement-05.pdf]

**Supplemental Figures for Linford A. et al. Crystal structure and putative substrate identification for the *Entamoeba histolytica* low molecular weight tyrosine phosphatase.**

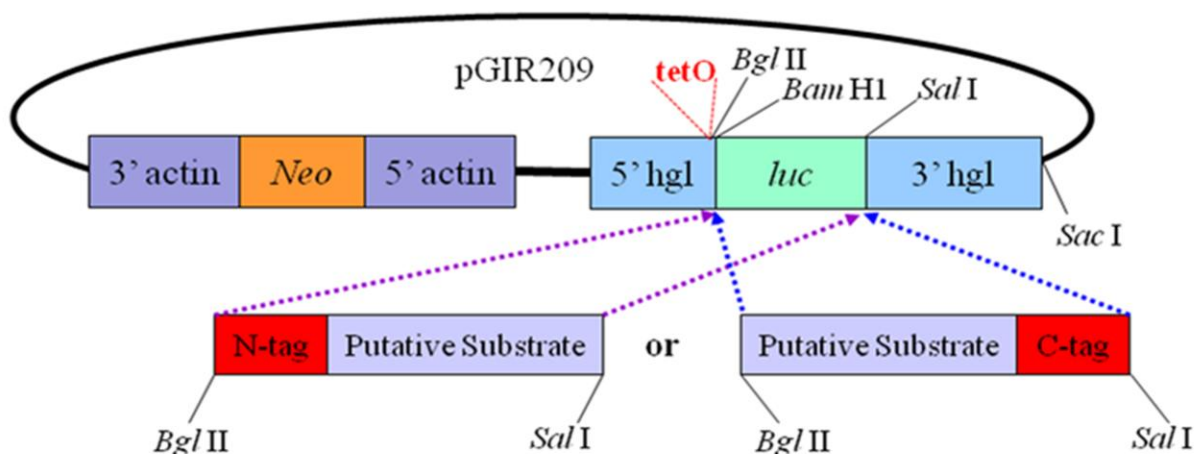

**Supplemental Fig. 1. Schematic representation of epitope-tagged putative substrate genes subcloned into pGIR209.** Selected putative substrate genes identified via mass spectrometry (Table 1) were subcloned into pGIR209 with epitope tags E, S, and KT3 added. 5' actin and 3' actin, 5' and 3' flanking regions of the *Entamoeba histolytica* actin gene; *Neo*, neomycin resistance gene; *luc*, luciferase gene; 5' *hgl* and 3' *hgl*, 5' and 3' flanking regions of the *E. histolytica hgl* gene; tetO, tetracycline operator; Putative Substrate, genes for putative substrate proteins of the LMW-PTP identified by mass spectrometry. N-tag, N-terminally added E-S-KT3 epitope tag; C-tag, C-terminally added E-S-KT3 epitope tag. As a control for transfection, drug selection, and expression of an epitope-tagged protein in amebae, URE3-BP was also cloned and expressed. The pGIR209 diagram is adapted from Ramakrishnan G, Vines RR, Mann BJ, Petri WA Jr. A tetracycline-inducible gene expression system in *Entamoeba histolytica*. Mol Biochem Parasitol 1997; 84(1):93-100, and Katz U, Bracha R, Nuchamowitz Y, Milstein O, Mirelman D. Comparison between constitutive and inducible plasmid vectors used for gene expression in *Entamoeba histolytica*. Mol Biochem Parasitol 2003; 128(2):229-33.

|             |    |                                                                                       |     |             |     |                                                                          |     |
|-------------|----|---------------------------------------------------------------------------------------|-----|-------------|-----|--------------------------------------------------------------------------|-----|
| Ent his 1   | 1  | -----MKLLFVCLGNICRSPAAEAVMKKVIQNHHLTEKYI-----CDSAGTCSYHGQQQDSRM-----                  | 54  | Ent his 1   | 55  | -----RK-VGKSR-GYQVDSI-----SRPVSDDFKNFYIIFAMNDNYDEL-----L-----D-RC--P     | 99  |
| Ent his 2   | 1  | -----MKLLFVCLGNICRSPAAEAVMKKVIQNHHLTEKYI-----CDSAGTCSYHGQQQDSRM-----                  | 54  | Ent his 2   | 55  | -----RK-VGKSR-GYQVDSI-----SRPVSDDFKNFYIIFAMNDNYDEL-----L-----D-RC--P     | 99  |
| Ent dispar  | 1  | -----MKLLFVCLGNICRSPAAEAVMKKVIQNHHLTEKYI-----CDSAGTCSYHGQQQDSRM-----                  | 54  | Ent dispar  | 55  | -----RK-VGKSR-GYQVDSI-----SRPVSDDFKNFYIIFAMNDNYDEL-----L-----D-RC--P     | 99  |
| Ent invad   | 1  | -----MKLLFVCLGNICRSPAAEAVMKKVIQNHHLTEKYI-----CDSAGTCSYHGQQQDSRM-----                  | 54  | Ent invad   | 55  | -----RK-VGKSR-GYQVDSI-----SRPVSDDFKNFYIIFAMNDNYDEL-----L-----D-RC--P     | 99  |
| Gia lam P15 | 1  | -----MKLLFVCLGNICRSPAAEAVMKKVIQNHHLTEKYI-----CDSAGTCSYHGQQQDSRM-----                  | 54  | Gia lam P15 | 55  | -----RK-VGKSR-GYQVDSI-----SRPVSDDFKNFYIIFAMNDNYDEL-----L-----D-RC--P     | 99  |
| Giard intes | 1  | -----MKLLFVCLGNICRSPAAEAVMKKVIQNHHLTEKYI-----CDSAGTCSYHGQQQDSRM-----                  | 54  | Giard intes | 55  | -----RK-VGKSR-GYQVDSI-----SRPVSDDFKNFYIIFAMNDNYDEL-----L-----D-RC--P     | 99  |
| Dictyo disc | 1  | -----MSADSKNQKLVFLVCLGNICRSTMAEIVLRLGVLHRSRLLDQF-----IDSAGTCSYHIGDTPPDRV-----         | 63  | Dictyo disc | 64  | QSCNQNMGR-A-ISEES-LKHFKSIPLHRAQQTDEDTSKFDYIIFAMDESINLSMKKVL-----KHST     | 125 |
| Klu lactis  | 1  | -----MSEQVSVAFVCLGNICRSPAAEAVFKHVEKGLQKFKRIEESFGTAGYHIVGESSPDSRS-----                 | 59  | Klu lactis  | 60  | -----AQYKSKHFKFDYIIFAMDESINLSMKKVL-----KHST                              | 125 |
| Sacch cerev | 1  | -----MTIEKPKSVAFIICLGNICRSPAAEAVFKHVEKGLQKFKRIEESFGTAGYHIVGESSPDSRS-----              | 59  | Sacch cerev | 63  | -----V-LCKQH-GVKTHK-----GKQKTKHFDYIIFAMDESINLSMKKVL-----KHST             | 125 |
| Schiz pombe | 1  | -----MTKNIQVLFVCLGNICRSPAAEAVFNRVEKAGLEAFRTDSDSCGTGAHWGNRPDR-----                     | 62  | Schiz pombe | 60  | -----LE-VLKN-GVTKHL-----ARKLSDFKNFYIIFAMDESINLSMKKVL-----KHST            | 125 |
| Sorg bicol  | 97 | MAAEASTADAAAAAEPFAVLFVCLGNICRSPAAEAVFRTLVRKRGDLSKFL-----IDSAGTIGYHEGNKADSRM-----      | 168 | Sorg bicol  | 169 | -----RA-ASKKR-GIEVTSI-----SRPVPDFRFDLIIAMDRQNYDEL-----LNSFERWRKKE-PL--P  | 222 |
| Zea mays 1  | 89 | MAAEASTAGAAAAPFAVLFVCLGNICRSPAAEAVFRTLVRKRGDLSKFL-----IDSAGTIGYHEGNKADSRM-----        | 160 | Zea mays 1  | 161 | -----RA-ASKKR-GIEVTSI-----SRPVPDFRFDLIIAMDRQNYDEL-----LNSFERWRKKE-PL--P  | 214 |
| Zea mays 2  | 1  | MAAEASTAGAAAAPFAVLFVCLGNICRSPAAEAVFRTLVRKRGDLSKFL-----IDSAGTIGYHEGNKADSRM-----        | 72  | Zea mays 2  | 73  | -----RA-ASKKR-GIEVTSI-----SRPVPDFRFDLIIAMDRQNYDEL-----LNSFERWRKKE-PL--P  | 126 |
| Oryza sat   | 85 | MAAEASAAAEGA-QAKPFSVLFVCLGNICRSPAAEAVFRTLVRKRGDLSKFL-----IDSAGTIGYHEGNKADSRM-----     | 155 | Oryza sat   | 156 | -----RS-ASKKR-GIEVTSI-----SRPVPDFRFDLIIAMDRQNYDEL-----LNSFERWRKKE-PL--P  | 209 |
| Hord vulg   | 8  | MAAEASTAPAEA-SAKPFAVLFVCLGNICRSPAAEAVFRTLVRKRGDLSKFL-----IDSAGTIGYHEGNKADSRM-----     | 148 | Hord vulg   | 149 | -----IS-TSKKR-GIEVTSI-----SRPVPDFRFDLIIAMDRQNYDEL-----LNSFERWRKKE-PL--P  | 202 |
| Arab thal   | 1  | MATPPPTQ-SS-----ETKPYSLVFLVCLGNICRSPAAEAVFRTLVRKRGDLSKFL-----IDSAGTIGYHEGNKADSRM----- | 68  | Arab thal   | 69  | -----RS-AAKKR-GIEVTSI-----SRPVPDFRFDLIIAMDRQNYDEL-----LNSFERWRKKE-PL--P  | 122 |
| Vit vinif   | 1  | MASGPSIDT-----QSKPYSVLFVCLGNICRSPAAEAVFRTLVRKRGDLSKFL-----IDSAGTIGYHEGNKADSRM-----    | 67  | Vit vinif   | 68  | -----RA-ASKKR-GIEVTSI-----SRPVPDFRFDLIIAMDRQNYDEL-----LNSFERWRKKE-PL--P  | 121 |
| Pop tricho  | 1  | -----MASS-TETKPPAVLFVCLGNICRSPAAEAVFRTLVRKRGDLSKFL-----IDSAGTIGYHEGNKADSRM-----       | 63  | Pop tricho  | 64  | -----RA-ASKKR-GIEVTSI-----SRPVPDFRFDLIIAMDRQNYDEL-----LNSFERWRKKE-PL--P  | 117 |
| Ricin comm  | 1  | -----MASSTETKPPAVLFVCLGNICRSPAAEAVFRTLVRKRGDLSKFL-----IDSAGTIGYHEGNKADSRM-----        | 66  | Ricin comm  | 66  | -----RA-ASKKR-GIEVTSI-----SRPVPDFRFDLIIAMDRQNYDEL-----LNSFERWRKKE-PL--P  | 119 |
| Nost punct  | 1  | -----MTIDRGKQTSMPYKLLFVCLGNICRSPAAEAVFRTLVRKRGDLSKFL-----IDSAGTIGYHEGNKADSRM-----     | 55  | Nost punct  | 67  | -----SA-AAAKLGKIKRQ-----ARQPKKSDFDLIIAMDRQNYDEL-----LNSFERWRKKE-PL--P    | 113 |
| Lynghya sp  | 1  | -----MPYKLLFVCLGNICRSPAAEAVFRTLVRKRGDLSKFL-----IDSAGTIGYHEGNKADSRM-----               | 56  | Lynghya sp  | 57  | -----TK-AASR-GILKQG-----ARQPKKSDFDLIIAMDRQNYDEL-----LNSFERWRKKE-PL--P    | 102 |
| Cyano sp    | 1  | -----MPYKLLFVCLGNICRSPAAEAVFRTLVRKRGDLSKFL-----IDSAGTIGYHEGNKADSRM-----               | 56  | Cyano sp    | 57  | -----NK-AASR-GILKQG-----ARQPKKSDFDLIIAMDRQNYDEL-----LNSFERWRKKE-PL--P    | 101 |
| Arthro max  | 1  | -----MSYKLLFVCLGNICRSPAAEAVFRTLVRKRGDLSKFL-----IDSAGTIGYHEGNKADSRM-----               | 56  | Arthro max  | 57  | -----TM-AAKR-GIVLKG-----ARQPKKSDFDLIIAMDRQNYDEL-----LNSFERWRKKE-PL--P    | 102 |
| Prochlo mar | 1  | -----MIRKVLFLVCLGNICRSPAAEAVFRTLVRKRGDLSKFL-----IDSAGTIGYHEGNKADSRM-----              | 56  | Prochlo mar | 57  | -----RS-AAKR-GIEVTSI-----SRPVPDFRFDLIIAMDRQNYDEL-----LNSFERWRKKE-PL--P   | 101 |
| Bdello bact | 1  | -----MTRGNNSPKIIMKRSKLLFVCLGNICRSPAAEAVFRTLVRKRGDLSKFL-----IDSAGTIGYHEGNKADSRM-----   | 69  | Bdello bact | 70  | -----IL-HGERR-GYDTSI-----SRPVPDFRFDLIIAMDRQNYDEL-----LNSFERWRKKE-PL--P   | 114 |
| Bact caccae | 1  | -----MKLLFVCLGNICRSPAAEAVFRTLVRKRGDLSKFL-----IDSAGTIGYHEGNKADSRM-----                 | 55  | Bact caccae | 56  | -----RA-HAARR-GYQVHR-----SRPVPDFRFDLIIAMDRQNYDEL-----LNSFERWRKKE-PL--P   | 102 |
| Bact theta  | 1  | -----MKLLFVCLGNICRSPAAEAVFRTLVRKRGDLSKFL-----IDSAGTIGYHEGNKADSRM-----                 | 55  | Bact theta  | 56  | -----RA-HAARR-GYQVHR-----SRPVPDFRFDLIIAMDRQNYDEL-----LNSFERWRKKE-PL--P   | 102 |
| Bact fragil | 1  | -----MKLLFVCLGNICRSPAAEAVFRTLVRKRGDLSKFL-----IDSAGTIGYHEGNKADSRM-----                 | 56  | Bact fragil | 57  | -----RA-HAARR-GYQVHR-----SRPVPDFRFDLIIAMDRQNYDEL-----LNSFERWRKKE-PL--P   | 103 |
| Parab merd  | 1  | -----MMEKKKGEKLLFVCLGNICRSPAAEAVFRTLVRKRGDLSKFL-----IDSAGTIGYHEGNKADSRM-----          | 62  | Parab merd  | 64  | -----RS-HAARR-GYQVHR-----SRPVPDFRFDLIIAMDRQNYDEL-----LNSFERWRKKE-PL--P   | 108 |
| Vibrio chol | 1  | -----MKRVLVVCLGNICRSPAAEAVFRTLVRKRGDLSKFL-----IDSAGTIGYHEGNKADSRM-----                | 55  | Vibrio chol | 56  | -----KA-AGER-GYFDSI-----KARKIRDFDFRFDLIIAMDRQNYDEL-----LNSFERWRKKE-PL--P | 101 |
| Pseudo aeru | 1  | -----MKRVLVVCLGNICRSPAAEAVFRTLVRKRGDLSKFL-----IDSAGTIGYHEGNKADSRM-----                | 55  | Pseudo aeru | 55  | -----RL-AAQR-GYDTSI-----RGRQVDFRFDLIIAMDRQNYDEL-----LNSFERWRKKE-PL--P    | 104 |
| Homo isof b | 1  | -----MAEQATKSVLFVCLGNICRSPAAEAVFRTLVRKRGDLSKFL-----IDSAGTIGYHEGNKADSRM-----           | 60  | Homo isof b | 61  | -----VS-CLRNH-GIHTAH-----ARQTKDFDFRFDLIIAMDRQNYDEL-----LNSFERWRKKE-PL--P | 104 |
| Homo isof c | 1  | -----MAEQATKSVLFVCLGNICRSPAAEAVFRTLVRKRGDLSKFL-----IDSAGTIGYHEGNKADSRM-----           | 60  | Homo isof c | 61  | -----QS-CMKRH-GIHTAH-----ARQTKDFDFRFDLIIAMDRQNYDEL-----LNSFERWRKKE-PL--P | 104 |
| Mus musc 1  | 1  | -----MAEVGSKSVLFVCLGNICRSPAAEAVFRTLVRKRGDLSKFL-----IDSAGTIGYHEGNKADSRM-----           | 60  | Mus musc 1  | 61  | -----VS-CLRNH-GIHTAH-----ARQTKDFDFRFDLIIAMDRQNYDEL-----LNSFERWRKKE-PL--P | 104 |
| Mus musc 2  | 1  | -----MAEVGSKSVLFVCLGNICRSPAAEAVFRTLVRKRGDLSKFL-----IDSAGTIGYHEGNKADSRM-----           | 60  | Mus musc 2  | 61  | -----QS-CMKRH-GIHTAH-----ARQTKDFDFRFDLIIAMDRQNYDEL-----LNSFERWRKKE-PL--P | 104 |
| Bos taurus  | 1  | -----MAEQATKSVLFVCLGNICRSPAAEAVFRTLVRKRGDLSKFL-----IDSAGTIGYHEGNKADSRM-----           | 60  | Bos taurus  | 61  | -----QS-CMKRH-GIHTAH-----ARQTKDFDFRFDLIIAMDRQNYDEL-----LNSFERWRKKE-PL--P | 104 |
| Xenop laev  | 1  | -----MAEQATKSVLFVCLGNICRSPAAEAVFRTLVRKRGDLSKFL-----IDSAGTIGYHEGNKADSRM-----           | 61  | Xenop laev  | 62  | -----LK-CLSKH-SIHTAH-----ARQTKDFDFRFDLIIAMDRQNYDEL-----LNSFERWRKKE-PL--P | 106 |
| Gal gallus  | 1  | -----MAEQATKSVLFVCLGNICRSPAAEAVFRTLVRKRGDLSKFL-----IDSAGTIGYHEGNKADSRM-----           | 60  | Gal gallus  | 61  | -----QT-CMKRH-GIHTAH-----ARQTKDFDFRFDLIIAMDRQNYDEL-----LNSFERWRKKE-PL--P | 104 |
| Dros melan  | 1  | -----MVRKVLFLVCLGNICRSPAAEAVFRTLVRKRGDLSKFL-----IDSAGTIGYHEGNKADSRM-----              | 55  | Dros melan  | 56  | -----IS-TLQKH-GIHTAH-----ARQTKDFDFRFDLIIAMDRQNYDEL-----LNSFERWRKKE-PL--P | 100 |
| Danio rerio | 1  | -----MAASSGKSVLFVCLGNICRSPAAEAVFRTLVRKRGDLSKFL-----IDSAGTIGYHEGNKADSRM-----           | 60  | Danio rerio | 61  | -----LA-CLRKH-GIHTAH-----ARQTKDFDFRFDLIIAMDRQNYDEL-----LNSFERWRKKE-PL--P | 105 |

## Supplemental Fig. 2. Alignment of the protein sequence of the *E. histolytica* LMW-PTPs with other selected LMW-PTP sequences.

The *E. histolytica* LMW-PTP protein XP\_656359 sequence (Ent his 1) was aligned with other LMW-PTPs. As compared with

XP\_656359: **Identical amino acids**, **conservative substitutions**, **active site**, **DPYY loop**. Supplemental Figs 3 and 4 show phylogenetic trees for all selected LMW-PTPs without and with the PTP1B outgroup.

Supplemental Data Set 2 lists tabulates species, LMW-PTP accession numbers, and percent identity and similarity to the *E. histolytica* LMW-PTP protein XP\_656359 for each LMW-PTP and PTP1B homologous sequence for each organism.

|             |     |                                                                   |     |
|-------------|-----|-------------------------------------------------------------------|-----|
| Ent his 1   | 100 | E-Q-YKQK-IFRMVDFCTTIKTE-VDPDYY-GGEGFHRVIDILEDACENLIILK-EEGKLN     | 157 |
| Ent his 2   | 100 | E-Q-YKQK-IFRMVDFCTTIKTE-VDPDYY-GGEGFHRVIDILEDACENLIILK-EEGKLN     | 157 |
| Ent dispar  | 100 | E-Q-YKQK-IFRMVDFCTTIKTE-VDPDYY-GGEGFHRVIDILEDACENLIILK-EQGLTN     | 157 |
| Ent invad   | 100 | K-E-YQDK-IHRMVEYCKKSDSE-VDPDYY-SGLKGEQVIDLEDGKMLLDQL-ENAGDE       | 156 |
| Gia lam P15 | 100 | K-R-DQSK-VRMFRDYDPEGR-GD-VDPDYY-CGR--FELVYSIVERTCRSLIDRT-KSGKAL   | 154 |
| Giard intes | 100 | K-R-DRSK-IRMFDRDYDPEGR-GD-VDPDYY-CGR--FELVYSIVERTCRSLIDRT-KNGKAL  | 154 |
| Dictyo disc | 126 | D-N-HIAT-IKRLGEVHTH-KKIN-VEPDYY-GMNSNINCNHVVHDCVNFVNLTE-ESLN      | 179 |
| Klu lactis  | 105 | K-E-PPAQ-LSLFGKWNNDKFDQ-IVDPDYY-GDSGFEYNFKQIYTFYSKQFKKEL          | 157 |
| Sacch cerev | 108 | E-G-SKAK-VCLFGEVNTNDCTVQTIIEFDW-GDIQDFEYNFKQIYTFYSKQFKKEL         | 161 |
| Schiz pombe | 105 | C-G-SRAK-VMLFGEYASPGVSKI-VDPDYY-GSDGFGDQYIQLVDFSNFKLSIA           | 156 |
| Sorg bicol  | 223 | E-N-APDK-VKLMCSYCKRHTESE-VDPDYY-GGPGQFEKVLDDLEDACESLIDSTV--ASISG  | 279 |
| Zea mays 1  | 215 | D-S-APNK-VKLMCSYCKQHTESE-VDPDYY-GGPGQFEKVLDDLEDACESLIDSTVANNASISG | 274 |
| Zea mays 2  | 127 | D-S-APNK-VKLMCSYCKQHTESE-VDPDYY-GGPGQFEKVLDDLEDACESLIDSTVANNASISG | 186 |
| Oryza sat   | 210 | D-S-SGPK-VKLMCSYCKRHTESE-VDPDYY-GGPGQFEKVLDDLEDACESLIDSTVAENASVEA | 268 |
| Hord vulg   | 203 | D-S-SGPK-VKLMCSYCKRHTESE-VDPDYY-GGPGQFEKVLDDLEDACESLIDSTVAENASVEA | 262 |
| Arab thal   | 123 | P-D-ADKK-VKLMCSYCKKHDFE-VDPDYY-GGPGQFEKVLDDLEDACESLIDSTVAQS       | 177 |
| Vit vinif   | 122 | A-D-AHKK-VKLMCSYCKKHDFE-VDPDYY-GGPGQFEKVLDDLEDACESLIDSTVAENSHLDS  | 182 |
| Pop tricho  | 118 | D-D-AHKK-VKLMCSYCKKHDFE-VDPDYY-GGPGQFEKVLDDLEDACESLIDSTVAENSHLDS  | 173 |
| Ricin comm  | 120 | D-D-AHKK-VKLMCSYCKKHDFE-VDPDYY-GGPGQFEKVLDDLEDACESLIDSTVAENSHLDS  | 172 |
| Nost punct  | 114 | E-Q-YQKH-VRLMCFECSRHTLKE-VDPDYY-GGQDFGNOVIDLILDACAGLLETKVKEEF     | 169 |
| Lynghya sp  | 103 | R-Q-YQDK-VKLMCFECSRHHNVQE-VDPDYY-GGPGGNOVIDLILDACAGLLETKVQKPPFKAF | 162 |
| Cyano sp    | 102 | SG-Q-YQDK-VRLICEFATHYSIKE-VDPDYY-GGPGGNOVIDLILDACAGLLETKVQKPPFKAF | 161 |
| Arthro max  | 103 | K-K-YQDK-VKLMCFECSRHTLKE-VDPDYY-GGPGGNOVIDLILDACAGLLETKVQKPPFKAF  | 160 |
| Prochlo mar | 103 | ELNISYKAK-VKPLLEYAINTDLVE-VDPDYY-GGEGFEDVNLLENALIEGLRIDIK         | 156 |
| Bdello bact | 115 | D-KTLDD-LSLVTDYCESEFVKV-VDPDYY-GGVDGDFHVDLILEDALIEGLRIDIK-ODRSKI  | 171 |
| Bact caccae | 103 | E-E-WK-K-IHRMTEYCNRI PADH-VDPDYY-GGAGGEFVLDLEDACAGLLETKVQKPPFKAF  | 156 |
| Bact theta  | 103 | E-E-WK-K-IHRMTEYCNRI PADH-VDPDYY-GGAGGEFVLDLEDACAGLLETKVQKPPFKAF  | 156 |
| Bact fragil | 104 | A-E-WK-K-IHRMTEYCNRI PADH-VDPDYY-GGAGGEFVLDLEDACAGLLETKVQKPPFKAF  | 157 |
| Parab merd  | 109 | DL-E-SVEK-IHRMTEYCNRI PADH-VDPDYY-GGAGGEFVLDLEDACAGLLETKVQKPPFKAF | 169 |
| Vibrio chol | 102 | C-S-HQHK-LSLMLSHSDS-EYQE-IPDPDYY-GGERGFEVLDLVEDAAEQFLIKL-CCQGQR   | 155 |
| Pseudo aeru | 102 | R-G-AABL-DLFLRRYGS-ERDE-VDPDYY-GGEGFEDVLDLIEDALIEGLRIDIK-BAKGR    | 154 |
| Homo isof b | 105 | N-Q-VKTRAKIELLGSYDPOKQLI-IEDPYY-GNDSDFETVYQCCVRCRAFLEKAH          | 158 |
| Homo isof c | 105 | N-Q-VKTRAKIELLGSYDPOKQLI-IEDPYY-GNDSDFETVYQCCVRCRAFLEKAH          | 158 |
| Mus musc 1  | 105 | N-Q-VKTRAKIELLGSYDPOKQLI-IEDPYY-GNDSDFETVYQCCVRCRAFLEKAH          | 158 |
| Mus musc 2  | 105 | N-Q-VKTRAKIELLGSYDPOKQLI-IEDPYY-GNDSDFETVYQCCVRCRAFLEKAH          | 158 |
| Bos taurus  | 105 | N-Q-VKTRAKIELLGSYDPOKQLI-IEDPYY-GNDSDFETVYQCCVRCRAFLEKAH          | 158 |
| Xenop laev  | 107 | QV-Q-NC-KAKIELLGSYDPOKQLI-IEDPYY-GRDDEFTVYQCCVRCRAFLEKSS          | 159 |
| Gal gallus  | 105 | N-Q-VKTRAKIELLGSYDPOKQLI-IEDPYY-GNDSDFETVYQCCVRCRAFLEKAH          | 158 |
| Dros melan  | 101 | K-G-SK-AEILMLGDFGLEKNRI-IEDPYY-ERGEAF-GEFTAYQCCVVAAMFKERLQK       | 155 |
| Danio rerio | 106 | SVE-N-SK-AKI-ELLGSYDPOKQLI-IEDPYY-GSDKDFETVYQCCVRCRAFLEKAH        | 158 |

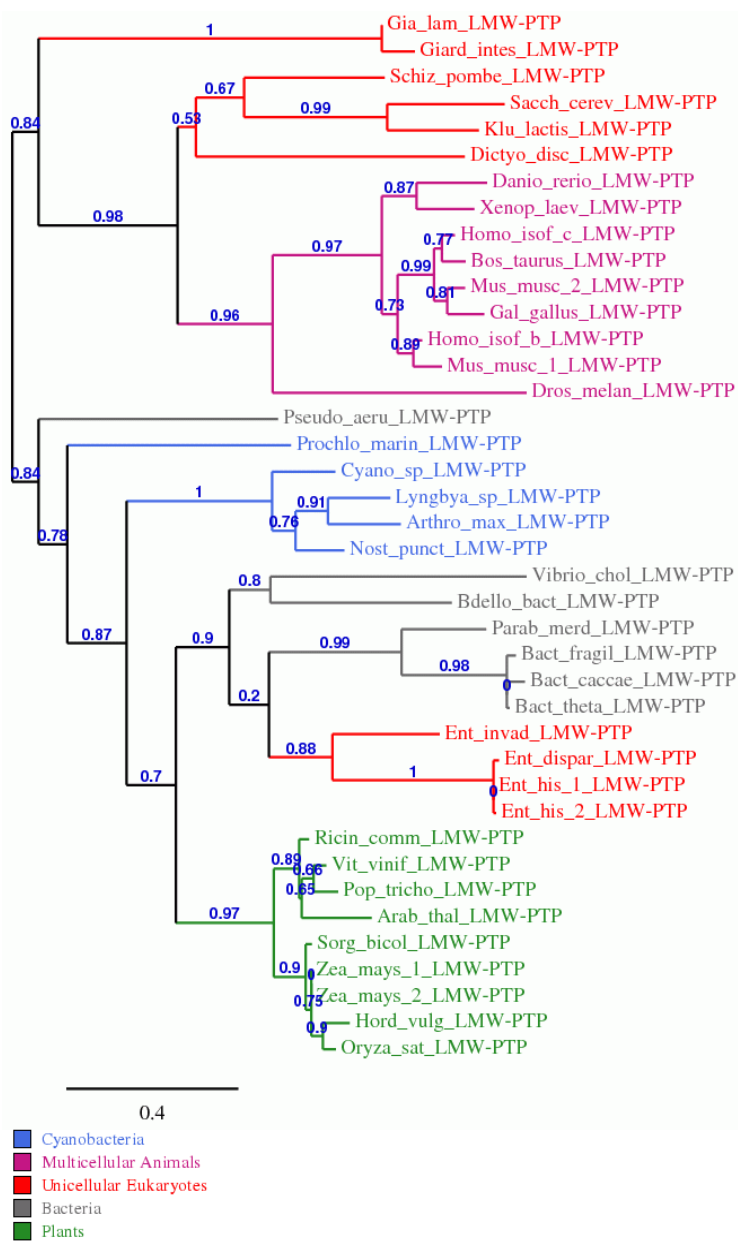

**Supplemental Fig. 3. A phylogenetic tree comparing the *E. histolytica* LMW-PTP protein XP\_656359 and selected LMW-PTP proteins from different species.**

Species abbreviations, LMW-PTP accession numbers, and percent identity and similarity to the *E. histolytica* LMW-PTP protein XP\_656359 for each LMW-PTP sequence are found in Supplemental Data Set 2, and LMW-PTP protein alignments are shown in Supplemental Fig. 2. The phylogenetic tree was created with “one-click” phylogenetic analysis using online software [www.phylogeny.fr] by inputting the protein sequences for the selected LMW-PTPs. Selected LMW-PTPs are color-coded in terms of the general phylogenetic groups into which they fall: cyanobacteria, multicellular animals, unicellular eukaryotes, bacteria, and plants. The scale bar at the bottom of the figure indicates the branch length representing the amount of genetic change

(the number of nucleotide substitutions divided by the length of the protein sequence)

[[http://epidemic.bio.ed.ac.uk/how\\_to\\_read\\_a\\_phylogeny](http://epidemic.bio.ed.ac.uk/how_to_read_a_phylogeny)]. The numbers in blue (between 0 and 1) at each node indicate the measure of support for the node (the node represents a putative ancestor), with 1 being maximal support. The phylogeny.fr web site uses the approximate likelihood-ratio test (aLRT) for branches to calculate this figure [Anisimova M, Gascuel O. Approximate likelihood-ratio test for branches: a fast, accurate, and powerful alternative. Syst Biol 2006; 55(4):539-52]. LMW-PTP sequences from cyanobacteria are shown in blue, those from multicellular animals are shown in violet, unicellular eukaryotic LMW-PTP sequences are red, bacterial LMW-PTPs are gray, and plant LMW-PTPs are green.

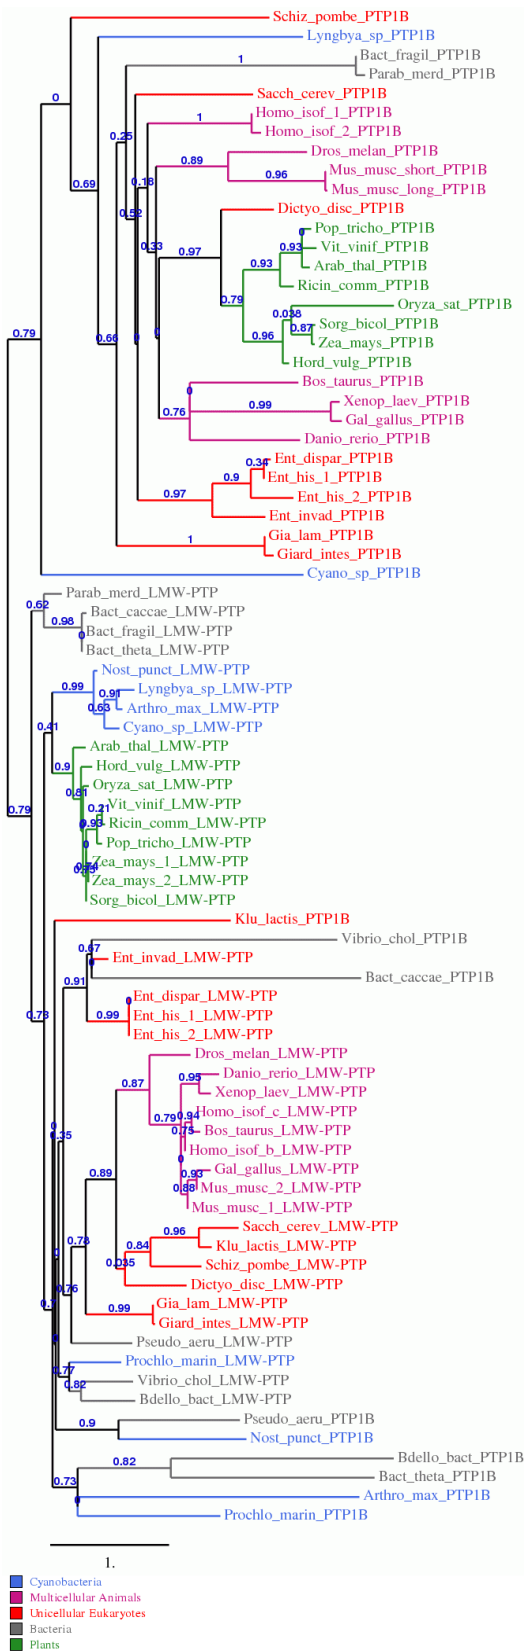

**Supplemental Figure 4. A phylogenetic tree comparing the *E. histolytica* LMW-PTP protein and selected LMW-PTP proteins from different species, and including as an outgroup proteins homologous to PTP1B from those same species.** Species abbreviations are in Supplemental Data Set 2, and LMW-PTP protein alignments are shown in Supplemental Fig. 2. The phylogenetic tree was created using online software ([www.phylogeny.fr](http://www.phylogeny.fr)) by inputting the protein sequences for the selected LMW-PTP and PTP1B homologues. The human PTP1B (isoform 1) sequence was input into BLAST [<http://blast.ncbi.nlm.nih.gov/Blast.cgi>] to identify the *E. histolytica* homologue; BLAST was then used to identify PTP1B homologues in the same organisms chosen for LMW-PTP comparison using the *E. histolytica* homologue. Sequences are labeled as LMW-PTP or PTP1B following the species abbreviation, and are color-coded in terms of the general phylogenetic groups into which they fall: blue for cyanobacteria, violet for multicellular animals, red for unicellular eukaryotes, gray for bacteria, and green for plants. The scale bar at the bottom of the figure indicates the branch length representing the amount of genetic change (the number of nucleotide substitutions divided by the length of the protein sequence). The numbers in blue (between 0 and 1) at each node indicate the measure of support for the node (the node represents a putative ancestor), with 1 being maximal support. Accession numbers, and percent identity and similarity to the *E. histolytica* LMW-PTP protein XP\_656359 for each LMW-PTP and PTP1B sequence are found in Supplemental Data Set 2.

Supplemental Fig. 3 shows the tree without the PTP1B outgroup, and more information is found in its legend.



**Protein sequence of hypothetical protein 328t.00002 (gi56465624)**

MNAFILLFIALATAEDIYSPFKRSCVIQ  
 NRINTI**TAQTKA**IHNKIRADEQQERNLN  
 DLSYLYRDLKYATVAEDRARLELE**TEA**  
**IQK**LHSVRIHKVNMLRDIRKETDKITAF  
 PFRDSIARSNKIE**RHVGLDEGNFVDER**  
**LKTQATI****KKVTSQLANKYATLAAKIAAQ**  
**SNVAKAAKKNNDAAKQAFVAKKAEAA**  
 YTKVHSKIVKAI**SAAVENGVARNNVE****TV**  
**AKTAIEQIVDKLMMKVAQPSVEAADKV**  
 AQNIVKSQLKQIKKAVKVT**PKVVKV**PKV  
 KKAVAKKVVKKAAPKPAAKKI**AKK**

| Peptide Sequence       |
|------------------------|
| (K) YATVAEDR (A)       |
| (K) VTSQLANK (Y)       |
| (K) VAAQPSVEAADK (V)   |
| (K) TATEQIVDK (L)      |
| (R) NNVE TVAK (T)      |
| (R) LELE IEAIQK (K)    |
| (K) KVTSQLANK (Y)      |
| (K) KFNNDAAK (V)       |
| (R) INTI TAQTK (A)     |
| (K) IAAQSNVAK (A)      |
| (R) HVGLEDEGNFVDER (L) |
| (K) AISAAVENGVAR (N)   |

**Protein sequence of type A flavoprotein (gi56474182)**

MKALEVVDKLYWVGVDFDKELRVFDIIMTTP  
 YGTSYNSFLKSE**KGNVLFETCKENFAGEC**  
**LERI**EDVIGKEGKLDYIVLNHTEPDHSGSL  
 VHILE**KYPEATVIGTMAALNNIKY**IGHIKE  
 NTKTNSGKI**KTLDLGNVHLKFLIQPFLHW**  
 PDTMMTVIEEMKVLVSCD**VFGGHYADERVF**  
**NDQMMERIKDMDAYKHDFDCIFGPFKNVY**  
 IKGLDMIE**TQMGFPSEDELKAI**CCSHGPVLR  
 THIKENIERQWQ**PIALKNKVV**IAYGSA  
 YGY**TQMAEQISEGIKSTGVEV**MFNIVES  
 SVGDV**LKE**FEDAKGLL**GTP**TLVNDT**IPPI**  
 MQIACSLNPT**IHCNRFVQC**FGSFGWS**GEGV**  
 KNL**SARIVQLKHQ**PVEPL**SIKQ**FPNSNEL  
**QTCFEWGGKFAEALKA**

| Peptide Sequence            |
|-----------------------------|
| (K) ENFAGEcLER (I)          |
| (K) FQPSNELQTcFEWGGK (K)    |
| (R) FVQcFGSFGWSGEGVK (N)    |
| (K) GLDMIE TQMGFPSEDELK (A) |
| (K) GNVLFETcK (E)           |
| (K) GNVLFETcKENFAGEcLER (I) |
| (K) HYFDcLFGPFK (N)         |
| (R) IKDMDAYK (H)            |
| (K) MAEQISEGIK (S)          |
| (K) MFNIVESVGDVLEK (E)      |
| (K) TLDLGNVHLK (F)          |
| (R) VFNDQmMER (I)           |
| (K) VLVScdVFGGHYADER (V)    |
| (K) VVIAYGSAYGYTQK (M)      |
| (K) YPEATVIGTmAALNNIK (Y)   |

**Protein sequence of the putative serine/threonine protein kinase (gi56466736)**

MTTPTKLQVSMQKINVAECS**KDFEVVEK**  
**L**EGSGVGFHAIHRPTGTHAAVKT**VRIDG**  
**DTTDVKE**IVLMKQCDTDYIVRF**FGHFFVD**  
 KDLWVMEICGAGSVCIDMNNLS**LDERE**  
 IQIIL**KD**TLHGLAYLH**KMH**HRDI**KAANI**  
**LVSDDG**VCKLADFGV**STK**GGTKLQ**KT**LI  
 GTPYMAPEVILESGHNEKAD**IWS**VGI**TAI**  
 EMFDGRPPHSELH**AMRAFLI**PNRPP**PLS**  
**TFEEVSKAFNDFIALCCVKNFRERPSALEL**  
**LRKCD**FMKPNGR**KRI**TDL**IEKENE**VIA**FCG**  
**SRK**KALEQ**GEDDE**GDDEZDDDD**TEEDT**  
 EEEEE**DDTE**EDSDDG**DDTMVIRK**

| Peptide sequence             |
|------------------------------|
| (K) AANILVSDDGcK (L)         |
| (K) AFNDFIALcCVK (N)         |
| (R) AIFLIPNRPPPLSTPEEVSK (A) |
| (K) DFEVVEK (L)              |
| (K) DTLHGLAYLHK (M)          |
| (R) ERPSALELLK (C)           |
| (R) IDGDTTDVEK (E)           |
| (R) ITDLIEKENEVIAEFGSR (K)   |
| (K) LADFGVSTK (M)            |

**Protein sequence of the conserved hypothetical protein (gi56465028)**

MEELINKNNQLIKEVETLPNIQQSIDDVN  
 NNYQSYLESIKNEVFFELKENE**TYSEAI**KRG  
 EGI**FDR**ME**TERRR**KL**VI**ESQ**ETIN**QIEI  
 MKNKI**SKIIEEC**NNDE**ETFGK**TRNELIDKI  
 ISIEEMIMKDKL**FRTEE**TD**ITSEFN**KKK  
 EE**WK**HYSDYLE**RK**RRKE**EEEE**KER**KKQE**  
 ERLQIMKGMNSMEEMRQIEEW**TKK**VGNVL  
**FESD**VDDWNN**KNTSVFDQK**LNKEHIMIVIE  
 DEEGNKFGGYVNSKID**EV**ESCITDQ**KS**FLF  
 SLE**SKGR**M**KRM**KFD**IK**EPQ**CAF**Y**LN**SQTD  
 DCL**FE**FG**GH**DI**CV**F**KN**NTQ**SYCY**Q**RSF**  
**EYNG**IS**NALCGK**QLPER**FTQ**KRIMV**IE**MK

| Peptide Sequence          |
|---------------------------|
| (K) VGNVLFESDVEDDWNK (N)  |
| (K) GmNSMEEMR (Q)         |
| (K) IIEECNNDEETFGK (T)    |
| (K) KVGNVLFESDVEDDWNK (N) |
| (K) NTSVFDQK (I)          |
| (R) RTEE TDTITSEFNK (K)   |
| (R) SFYEYNGISNALcGK (Q)   |

**Protein sequence of the putative ARP2/3 complex 34 kda subunit (gi56471818)**

MAPNLLLESYNRIVYARVLEKLTTEGGIKK  
 GLKE**KLADFNQSIWYIERT**KEKMTISVSTP  
 CWKQ**LKENRSLEFLQ**KVYGS**DL**VEADNS**E**  
 YNLIT**PI**EKHDKPEEFAMNA**AKLLTNMLI**  
**GP**AVV**L**AD**EV**KNKADEKL**VQIDYR**PGESY  
 WLK**PN**GDRL**TVIF**SI**K**FDD**KD**DA**V**FG**RVFI**  
**NE**FSK**SAAG**CP**SCD**V**TR**KN**AP**PPSE**L**KT**V**  
 E**GL**AD**NCY**IS**FL**LE**KR**HL**NP**Q**KT**LE**VLM**  
**SCR**NYIN**F**HI**K**CSKA

| Peptide Sequence           |
|----------------------------|
| (K) FDDKDDAVFGR (V)        |
| (K) LADFNQSIWYIER (T)      |
| (K) LLTNMLIGPAVVLADEVK (N) |
| (K) SAAGCPSCDVVTR (K)      |
| (R) SLEFLQK (V)            |
| (K) TLEVLmScR (N)          |
| (R) VFINEFSK (S)           |

**Protein sequence of the hypothetical protein 503.t00001 (gi56464309)**

MSGIGDAFGRKFYQIKTHVGA**QK**TMDSDV  
**QYAK**NK**LE**SY**K**FK**N**LDV**IK**LAP**TV**HA  
 TNL**M**Q**VE**VL**T**SL**GD**CV**V**NT**SP**ET**K**SD**IDS****I**  
**IS**TF**Q**IDE**GV**NT**YE**TR**IES**DI**IV**PL**K**TY**M**  
 EQ**F**VM**E**K**RF**ICH**N**RR**V**DM**D**RY**H**DS**V**LS**I**  
**SK**K**PP**G**K**Q**S**GL**GEA**Q**N**K**Y**N**V**ARD**LY**N**LR**N  
 E**I**AD**VE**KL**T**SS**A**EV**VS**PI**CG**TL**IV**SY**TD**  
 YLNHLNNY**W**GE**A**SE**V**SN**F**RI**C**AL**D**P**API**  
 TP**G**ESS**M**VID**AN**V**S**KK**S**SD**V**MG**T**Y**E**P**SE**  
 F**EN**SG**S**TT**T**ST**T**TT**T**TT**V**ST**S**SG**R**PP**P**  
 P**PP**SR**KE**Q**VR**CE**Y**EQ**AE**Q**GE**LS**F**KE**GD**I  
 I**TV**L**K**KE**GD**W**W**L**GE**L**K**D**N**K**D**T**S**H**T**IM**FL**H**F**  
 K**FT**FL**K**D**Y**F**IS**SS**L**F**IQ**N**K**EL

| Peptide Sequence    |
|---------------------|
| (K) EGDWLLGELK (D)  |
| (K) IDEGVNTYETR (I) |
| (R) IESDIIVPLK (T)  |
| (K) QSGLGEAQNK (Y)  |
| (K) SDIDSISTFQK (I) |
| (K) TmSDVQYAK (N)   |
| (R) YHDSVLSISK (K)  |

**Protein sequence of the putative ribose-phosphate pyrophosphokinase (gi56473321)**

MSVTTLSAEQ**W**HDHFIVHTSKAGYLAQS  
 ISAVLGYPI**IP**I**HK**FS**D**GE**CY**RI**AI**PE  
 RTSLVGRD**VVV**SS**IV**DD**Q**EL**LE**V**V**R**IG**GE  
 LAELG**TK**R**R**I**F**VI**P**Y**LM**Y**ST**ME**RAVHPGEV**  
**VT**CK**S**TV**R**ML**CG**IP**SS**GL**GN**LF**ML**MD**L**HT**S**  
 GI**I**HY**F**EG**T**VQ**AM**E**LY**A**ES**T**LE**Q**AI**EN**ID**  
 F**SE**P**VI**FG**S**AD**L**GR**PL**W**VE**TF**AN**H**F**GV**G**IA  
 F**IR**K**S**RS**F**ED**TH**VI**GE**PI**GD**V**K**G**H**V**VI**Y**D**  
 DL**TR**S**AG**SL**IK**AC**N**AY**DL**NG**AI**K**V**T**AV**V**TH**  
 L**SL**IDD**V**VQ**V**IDS**R**ID**RV**IA**T**NS**N**VR**S**Q  
 MD**AV**K**NS****KRF**I**IC**DI**SP**V**FA**Q**I**RA**CL**NN  
 ND

| Peptide Sequence      |
|-----------------------|
| (R) AVHPGEVVTcK (S)   |
| (K) FSDGEcYYR (I)     |
| (K) KFIICDISPVFAK (Q) |
| (R) VIATNSNVR (S)     |

**Supplemental Fig. 5. Sequences of unique peptides and their locations in the protein sequences of putative substrate proteins identified by mass spectrometry and selected for further evaluation. Locations of the unique peptides are shown in yellow in the protein sequence, and the list of unique peptides identified for each protein is located in the table to the right of each protein sequence.**

**Hypothetical protein 328.t00002 (gi56465624; XM\_644144)**

1 MNAFILLFIALATAEDIYSPFKRSCVIQNRINTITAQTKAHNRKIRADEQ  
 51 QERNLNDLSLYLYRDLKATVAEDRARLELEIEAIQKHLHVRHKNVNL  
 101 RDIRKETDKITAPFRDSIARSNKIERHVGLEDEGNFVDERLKTQATIKKV  
 151 TSQLANKYATLAAKIAAQNVAKAAKFNNDAAKVQAFVAKKAEAAATYKV  
 201 HSKIIVKAIASAAVENGAVRNNEVETAKTAIEQIVDKLMMKVAQPSVEAAD  
 251 KVQNIIVKSQLKQIKKAVKVTFKVKVVKPVKAVAKVVKVKAAPKPAAKK  
 301 IAKK

Phosphorylation sites predicted: Tyr: 3

| Name       | Pos | Context     | Score | Pred |
|------------|-----|-------------|-------|------|
| 328.t00002 | 18  | AEDTYSPPFK  | 0.948 | *Y*  |
| 328.t00002 | 68  | RLDKYATVA   | 0.970 | *Y*  |
| 328.t00002 | 197 | AEAAATYKVVH | 0.829 | *Y*  |

**Type A flavoprotein (gi56474182; XM\_651854)**

1 MKALEVVKDLYVWGVDFKELRVFDIIMTTPYGTSYNSFLKSEKGNVLFEE  
 51 TCKENFAGECLERIEDVIGKEGKLDIVLNHTEPDHSGSLVHILEKYPEA  
 101 TVIGTMAALNNIKYIGHIKENTKTLNSGKIKTLDLGNVHLKFLIQPFLHW  
 151 PDTMTVIEEMKVLVSCDVFVGGHADERVFNQMMERIKDMDDAKHYFD  
 200 CIFGPFKNYVIKGLDMIETQMGGFSDDELKAIACCSHGVLTRTHIKENIERY  
 251 RQWAQPIALKNRVVIAYGSAYGYTQKMAEQISEGIKSTGVEVKMFNIVES  
 301 SVGDVLEKFEFADAKGLLLGTPPTLVNDTIPPIQIACSLNPTIHCNRFVQCF  
 351 GSPGWSGEGVKNLSARIVQLKVHQPVEPLSIFQPNNSNLQTCFEWGGKFF  
 401 AEALKA

Phosphorylation sites predicted: Tyr: 4

| Name    | Pos | Context   | Score | Pred |
|---------|-----|-----------|-------|------|
| Flavopr | 76  | GKLDYIVLN | 0.821 | *Y*  |
| Flavopr | 174 | FGGHYADER | 0.795 | *Y*  |
| Flavopr | 195 | MDDAYKHYP | 0.513 | *Y*  |
| Flavopr | 209 | PFKNYVIKG | 0.574 | *Y*  |

**Serine/threonine protein kinase, putative (gi56466736; XM\_645070)**

1 MTTPTKLQVSMQKINWVAECSKDFVEVKEKLEGGSSVFAIHRPTGTH  
 51 AAVKTVRIDGDTTVEKEIVLMKQCDTYIVRFFGHFFVDKDLWVMEIC  
 101 GAGSVCIDIMNINLSTLDEREIQIILKDTLHGLAYLHKHMHHRDIKAANI  
 151 LVSDDGVCKLADFGVSTKMGGLNKQKTLIGTPYWMAPVILESGHNEKA  
 201 DIWSVGITAIEMFDRPPELHARRAIPLIPNRPPTLSTPEEVSKAFN  
 251 DFIALCCVKNFRERFSALELLKCCDFMKNPGRKRITDLEKENEVIAEFG  
 301 SRKALAEQGEDDDEGDDEQDDDDTEEDTEEEEDTEEDSDDGDDTM  
 351 VIRK

Phosphorylation sites predicted: Tyr: 2

| Name     | Pos | Context    | Score | Pred |
|----------|-----|------------|-------|------|
| ProtKina | 36  | GEGSYGGSVF | 0.816 | *Y*  |
| ProtKina | 79  | CDTYIVRF   | 0.809 | *Y*  |

**Conserved hypothetical protein (gi56465028, XP\_001914335)**

1 MEELINKNNQLIKEVETPLNQQSIDDDVNNYQSYLESIKNEVFELKEN  
 51 ETYSEAIKRGEGIFDRMDETERRRKLVEKSQETINQIEIMNKISKIIE  
 101 ECNNDDETFGKTRNELIDKIISEEMIMKDKLFRRTTEETDTITSEFNKKK  
 151 EEWKKHYSYDLERKKRKEEBEERKQEEERLQIMKGMNSMEEMRQIEE  
 201 WTNKKGNVLFESVDVDDWKNSTVFDQKIKNKEHIMIVIEDEEGNKFGGY  
 251 VNSKIDEVESCITDQKSLFLESKGRMKRMMKFDKEPQCAFYLNSTQTD  
 301 DCLFEFFGFDICVFKENKNTQSYCYQRSFENYINGISNALCGKQLPERFTQ  
 351 KRIMVIEEMK

Phosphorylation sites predicted: Tyr: 3

| Name     | Pos | Context   | Score | Pred |
|----------|-----|-----------|-------|------|
| Cons hyp | 53  | ENETYSEAI | 0.927 | *Y*  |
| Cons hyp | 157 | WKKHYSYDL | 0.562 | *Y*  |
| Cons hyp | 250 | KFGYVNSK  | 0.953 | *Y*  |

**Ribose-phosphate pyrophosphokinase, putative (gi56473321, XP\_656141)**

1 MSVTTLSLAEQWQHDHFVHTSKAGYLAQSIASVAVLGYPIIPIHKKFFSDG  
 51 ECYRIAPERTSLVGRDVVVSSIVDDQELLEVVRIIGGELAEALGTRRI  
 101 FVIPIYLMYSTMERAVHPGEVVTCKSTVRMLCGIPSSGLNLFMLMDLHTS  
 151 GIHYFEGTVQAMELAEASTLEQAIAENIDFSEPVIFGSADLGRPLWVET  
 201 FANHFVGVIAPIKRSRSEDTHVIGEPIDGVKGGHVVIYDDLTRISAGSLI  
 251 KACNAYLDNGAIVKVTAVVTHLSLIDDDVQKVIDSRIDRVATNSNVRVRSQ  
 301 MDAVKNSKKFIICDISPVFAKQIRACLNNND

Phosphorylation sites predicted: Tyr: 3

| Name     | Pos | Context   | Score | Pred |
|----------|-----|-----------|-------|------|
| Rib-phos | 53  | DGECYRIA  | 0.784 | *Y*  |
| Rib-phos | 166 | AMELYAEST | 0.956 | *Y*  |
| Rib-phos | 256 | ACNAYLDNG | 0.947 | *Y*  |

**ARP2/3 complex 34 kDa subunit, putative (gi56471818, DS571335)**

1 MAPNLLLESYNRIVYARVLEKLTTEGGIKKGLKEKLADEFNOSIWIYERTK  
 51 EKMTISVSTPCWKQLKENRSLFELQKVVYSGDLVEADSENENLILTIPEK  
 101 HDKPEEFAMNAAKLLTNLIGPAVVLADVKNKKADEKLVQIDYRPGESY  
 151 WLKPNGRDLTVIFSLKFDKDDAVFGRVFNFEFSKSAAGCPSCDVVTRKN  
 201 APPPELKTVEGLAEDNCISFLLEKRHLNNPQKTLVLMSCRNYINFHI  
 251 KCSKAFHIRMNRKVSHLQVLNRAKPERVEKKTASGRFTFK

Phosphorylation sites predicted: Tyr: 4

| Name    | Pos | Context   | Score | Pred |
|---------|-----|-----------|-------|------|
| Arp 2/3 | 91  | SNSYLNLL  | 0.767 | *Y*  |
| Arp 2/3 | 150 | PGESYWLKP | 0.721 | *Y*  |
| Arp 2/3 | 219 | EDNYSISFL | 0.884 | *Y*  |
| Arp 2/3 | 245 | SCRNYINFH | 0.737 | *Y*  |

**Hypothetical protein 503.t00001 (gi56464309, XP\_656019)**

1 MSGIGDAFGRKFIQIKTHVAGQKMTSDSVYAKNKLSEYKFKFNILDV  
 51 IKKLAPTVAHATNLQVEVLTSLGDCVNTSPETKSDIDSIIISFQKIDEG  
 101 VNTYETRIESDIIIVPLKTYMEQPKVMEKRFIECHNRVDMDRYHDSVLSI  
 151 SKKPPGKQSLGEAQNRYNVARLDYLNREIADVKELTSSAEVVSPI  
 201 CGTLIVSYTDYLNHNNYWGAESEVSSNFRICALDPAPITPGESSMVID  
 251 ANVFSKSSDVMMDTYEPSEFENSGSSTTTSTTTTTTSTSSGKRPPPP  
 301 PPSRKEQVRCEYEQAQEQGELSFKREGDIIITVLKREGDWLGLKDNKDT  
 351 SHTIMFLHFKFTFELKDYFISFSLFTFNKEL

Phosphorylation sites predicted: Tyr: 6

| Name  | Pos | Context   | Score | Pred |
|-------|-----|-----------|-------|------|
| 501.t | 32  | SDVQYAKNK | 0.957 | *Y*  |
| 501.t | 41  | LSEYKFKF  | 0.519 | *Y*  |
| 501.t | 143 | DMDRYHDSV | 0.971 | *Y*  |
| 501.t | 211 | SYTDYLNHL | 0.927 | *Y*  |
| 501.t | 266 | MDGTYEPSE | 0.607 | *Y*  |
| 501.t | 314 | CEYEQAQE  | 0.575 | *Y*  |

**Calcium-binding protein, putative, URE3-sequence specific DNA binding protein (URE3-BP) (AAG18423).**

1 MQPPVANFCLWNLQPIQGSWMGAACIYQMPPSVNTWVFLPNTLPLDQY  
 51 TRIYQWFMGVDRDRSGTLEINELMMGQFPGGIRLSPQTLRMMRIFDTFD  
 101 NGHISFYEFMAMYKFMELAYNLVFMNDRNRSGTLEPHEILPALQLGFYI  
 151 NQRTSLLLHRLFARGMAFCDLNCWIAICAFAAQTRSAQMIQMPNYGPM  
 201 KPFNMEFGKFLDVTLSLLE

Phosphorylation sites predicted: Tyr: 2

| Name    | Pos | Context   | Score | Pred |
|---------|-----|-----------|-------|------|
| URE3-BP | 50  | PLDQYTRIY | 0.804 | *Y*  |
| URE3-BP | 197 | MNPYQGMK  | 0.698 | *Y*  |

**Supplemental Fig. 6. Protein sequences and predicted tyrosine phosphorylation sites in selected putative substrate proteins. Tyrosine phosphorylation sites were predicted using the NetPhos 2.0 server at**

<http://www.cbs.dtu.dk/services/NetPhos/>. URE3-BP was included as a control. Protein sequences are shown with predicted phosphorylated tyrosines in bold and highlighted, with their surrounding residues in a table below. The closer the score is to a value of one the more likely the phosphorylation of that tyrosine residue.

**Supplemental Table 1. Crystallographic X-ray data and refinement statistics.** Crystallized recombinant *E. histolytica* LMW-PTP representing different states along the catalytic pathway were subjected to X-ray diffraction in order to solve their structures: the enzyme with no ligand bound (apo structure), with the substrate mimic HEPES bound, and with the phosphate analog sulfate bound. Citation for MolProbity: Davis IW, Leaver-Fay A, Chen VB, Block JN, Kapral GJ, Wang X, et al. MolProbity: all-atom contacts and structure validation for proteins and nucleic acids. Nucleic Acids Res 2007; 35(Web Server issue):W375-W383.

|                                                         | <b>Apo structure</b>            | <b>HEPES (form 1)</b>          | <b>HEPES (form 2)</b>           | <b>Phosphate analog</b>         |
|---------------------------------------------------------|---------------------------------|--------------------------------|---------------------------------|---------------------------------|
| <b>PDB ID</b>                                           | 3ILY                            | 3IDO                           | 3JS5                            | 3JVI                            |
| <b>Crystal parameters</b>                               |                                 |                                |                                 |                                 |
| Space group                                             | $P4_3$                          | $P2_12_12_1$                   | $P2_12_12_1$                    | $P4_32_12$                      |
| Cell dimensions<br>a=b=c (Å), $\alpha=\beta=\gamma$ (°) | 45.7, 45.7, 132.3<br>90, 90, 90 | 60.6, 70.4, 79.2<br>90, 90, 90 | 38.6, 60.3, 72.56<br>90, 90, 90 | 45.0, 45.0, 133.3<br>90, 90, 90 |
| <b>Data set</b>                                         |                                 |                                |                                 |                                 |
| X-ray Source                                            | FRE+<br>Superbright             | ALS 5.0.3                      | MicroMax 007 HF                 | FRE+ Superbright                |
| Wavelength (Å)                                          | 1.54                            | 0.9765                         | 1.5418                          | 1.5418                          |
| Resolution (Å)                                          | 50-2.2<br>(2.28-2.20)           | 50-2.2<br>(2.28-2.20)          | 50-1.95<br>(2.02-1.95)          | 50-1.80<br>(1.86-1.80)          |
| Rmerge                                                  | 0.063 (0.316)                   | 0.140 (0.492)                  | 0.066 (0.198)                   | 0.059 (0.231)                   |
| I/sigma (I)                                             | 23.6 (4.3)                      | 14.0 (2.4)                     | 19.6 (4.7)                      | 17.7 (4.1)                      |
| Completeness                                            | 98.3% (85.4%)                   | 98.6% (89.5%)                  | 97.9% (84.9%)                   | 94.6% (98.2%)                   |
| # reflections, unique                                   | 13,504 (1154)                   | 17,494 (1539)                  | 12,697 (1069)                   | 23,136                          |
| Multiplicity                                            | 4.5 (3.4)                       | 8.1 (5.7)                      | 4.4 (2.2)                       | 4.3 (2.5)                       |
| <b>Refinement statistics</b>                            |                                 |                                |                                 |                                 |
| R <sub>work</sub>                                       | 0.211 (0.245)                   | 0.206 (0.281)                  | 0.169 (0.215)                   | 0.206 (0.260)                   |
| R <sub>free</sub>                                       | 0.264 (0.325)                   | 0.254 (0.315)                  | 0.212 (0.244)                   | 0.249 (0.361)                   |
| RMSD bond lengths (Å)                                   | 0.016                           | 0.010                          | 0.009                           | 0.012                           |
| RMSD bond angles (Å)                                    | 1.529                           | 1.211                          | 1.087                           | 1.273                           |
| Ramachandran:                                           |                                 |                                |                                 |                                 |
| Preferred                                               | 96.2%                           | 98.7%                          | 98.1%                           | 97.4%                           |
| allowed                                                 | 99.3%                           | 100%                           | 100%                            | 99.4%                           |
| disallowed                                              | 0.7%                            | 0%                             | 0%                              | 0.6%                            |
| MolProbity clash score                                  | 7.82 (95 <sup>th</sup> )        | 4.94 (98 <sup>th</sup> )       | 4.00 (98 <sup>th</sup> )        | 10.22 (72 <sup>nd</sup> )       |
| Molprobity score                                        | 21.8 (75 <sup>th</sup> )        | 1.56 (98 <sup>th</sup> )       | 1.19 (99 <sup>th</sup> )        | 2.01 (62 <sup>nd</sup> )        |
